# Supplementary material for: Dynamic interplay between non-coding enhancer transcription and gene activity in development
Source: bioRxiv or medRxiv preprint supplement (doi:10.1101/2022.08.02.502573), 2022-08-03
Supplement: Supplementary file [file media-3.pdf]

| Location of enhancer        | FlyEnhancer ID | Target gene      | TSS score (reads/kb) | Enhancer size (kb) | Cumulative fraction of TSS score |
|-----------------------------|----------------|------------------|----------------------|--------------------|----------------------------------|
| chr3L:9,797,330-9,797,598   | VT28267        | <i>llp4</i>      | 6007.5               | 0.268              | 100                              |
| chr3R:20,574,703-20,575,504 | VT46946        | <i>tld</i>       | 5048.7               | 0.801              | 91.55642245                      |
| chr3R:20,997,630-20,999,927 | VT47167        | <i>danr</i>      | 3410.5               | 2.297              | 84.46041528                      |
| chr3R:12,524,782-12,526,937 | VT42746        | <i>Ubx</i>       | 3116.0               | 2.155              | 79.66685728                      |
| chr3R:12,747,382-12,749,489 | VT42849        | <i>Abd-B</i>     | 2499.3               | 2.107              | 75.28726021                      |
| chr3R:17,201,451-17,203,140 | VT45189        | <i>mod(mdg4)</i> | 2016.0               | 1.689              | 71.77447388                      |
| chr2L:10,388,040-10,390,080 | VT5287         | <i>da</i>        | 1903.4               | 2.04               | 68.94097607                      |
| chr3L:14,749,272-14,751,412 | VT30868        | <i>Trl</i>       | 1390.2               | 2.14               | 66.26567516                      |
| chr3R:21,008,302-21,010,513 | VT47173        | <i>danr</i>      | 1165.1               | 2.211              | 64.31174691                      |
| chr3R:12,526,519-12,528,610 | VT42747        | <i>Ubx</i>       | 1122.0               | 2.091              | 62.6742046                       |
| chr3R:12,075,311-12,077,425 | VT42491        | <i>tara</i>      | 1034.5               | 2.114              | 61.09728558                      |
| chr3L:20,396,551-20,398,733 | VT33785        | <i>trbl</i>      | 999.1                | 2.182              | 59.64323601                      |
| chr2R:11,016,930-11,019,079 | VT17013        | <i>chn</i>       | 910.7                | 2.149              | 58.23900951                      |
| chr2L:2,752,765-2,754,884   | VT1404         | <i>Bacc</i>      | 870.7                | 2.119              | 56.95906889                      |
| chr2L:11,794,041-11,794,478 | VT6030         | <i>crol</i>      | 691.1                | 0.437              | 55.735296                        |
| chr2R:19,467,816-19,469,873 | VT21426        | <i>apt</i>       | 664.1                | 2.057              | 54.76397915                      |
| chr2R:2,583,575-2,585,628   | VT12642        | <i>Rab2</i>      | 638.1                | 2.053              | 53.83061348                      |
| chr3L:20,398,155-20,400,412 | VT33786        | <i>trbl</i>      | 637.1                | 2.257              | 52.93376772                      |
| chr3R:12,073,519-12,075,931 | VT42490        | <i>tara</i>      | 610.3                | 2.412              | 52.03827359                      |
| chr3R:12,745,522-12,747,731 | VT42848        | <i>Abd-B</i>     | 608.4                | 2.209              | 51.18051333                      |
| chr3R:18,352,267-18,354,359 | VT45801        | <i>CG5346</i>    | 600.4                | 2.092              | 50.3253699                       |
| chr3L:8,645,778-8,647,917   | VT27671        | <i>h</i>         | 596.5                | 2.139              | 49.48152355                      |
| chr3L:20,688,420-20,690,975 | VT33934        | <i>kni</i>       | 576.1                | 2.555              | 48.64307715                      |
| chr2L:2,162,032-2,164,151   | VT1082         | <i>aop</i>       | 554.0                | 2.119              | 47.83332461                      |
| chr2R:20,400,628-20,402,887 | VT21906        | <i>Letm1</i>     | 504.6                | 2.259              | 47.05462034                      |
| chr2L:2,163,674-2,165,773   | VT1083         | <i>aop</i>       | 455.5                | 2.099              | 46.34533002                      |
| chr3R:7,604,792-7,606,922   | VT40165        | <i>Lk6</i>       | 452.1                | 2.13               | 45.70518132                      |
| chr3R:2,684,413-2,686,617   | VT37567        | <i>ftz</i>       | 444.6                | 2.204              | 45.06973027                      |
| chr2R:10,060,721-10,062,851 | VT16530        | <i>cg</i>        | 416.9                | 2.13               | 44.44477361                      |
| chr2L:8,844,948-8,847,235   | VT4450         | <i>SoxN</i>      | 405.3                | 2.287              | 43.85881252                      |
| chr3R:15,166,068-15,168,266 | VT44122        | <i>DI</i>        | 397.2                | 2.198              | 43.2891089                       |
| chr2R:1,597,188-1,599,358   | VT12230        | <i>ap</i>        | 392.6                | 2.17               | 42.73086759                      |
| chr2L:21,843,469-21,845,803 | VT11145        | <i>tsh</i>       | 384.7                | 2.334              | 42.17902492                      |
| chr3R:15,140,147-15,142,388 | VT44107        | <i>DI</i>        | 384.2                | 2.241              | 41.63825703                      |
| chr2L:21,841,894-21,844,018 | VT11144        | <i>tsh</i>       | 374.8                | 2.124              | 41.09825336                      |
| chr3L:9,013,475-9,016,012   | VT27864        | <i>Doc1</i>      | 368.9                | 2.537              | 40.57151619                      |
| chrX:5,479,796-5,481,897    | VT57351        | <i>Vsx1</i>      | 368.4                | 2.101              | 40.052966                        |
